# Supplementary material for: Influence of the interventionist’s experience on outcomes of endovascular thrombectomy in acute ischemic stroke: results from the MR CLEAN Registry
Source: PubMed Central journal article supplement — J Neurointerv Surg. 2022 Jan 20;15(2):113–9. doi: 10.1136/neurintsurg-2021-018295 (PMC9872238; doi:10.1136/neurintsurg-2021-018295), 2022-01-20
Supplement: neurintsurg-2021-018295supp001.pdf [file neurintsurg-2021-018295supp001.pdf]

1 **SUPPLEMENTAL MATERIAL**

2

3 **Table of contents**

4 - Table I. Procedural characteristics of patients treated by interventionists who

5 previously performed either fewer than 45 or 45 and more EVT procedures.

6 - Table II. Effect estimates for the association between interventionist's years of

7 experience (EXPyyears) and clinical, radiological, and work-flow outcomes.

8

| Table I. Procedural characteristics of patients treated by interventionists who previously performed either < 45 or $\geq$ 45 EVTs.  |                       |                             |         |
|--------------------------------------------------------------------------------------------------------------------------------------|-----------------------|-----------------------------|---------|
|                                                                                                                                      | EXPno <45<br>(n=1285) | EXPno $\geq$ 45<br>(n=1304) | P-value |
| Balloon guide catheter–n.(%)                                                                                                         | 624 (60)              | 653 (69)                    | <.001   |
| Placement of ICA stent–n.(%)                                                                                                         | 102 (8.2)             | 68 (5.3)                    | .004    |
| General anaesthesia–n.(%)                                                                                                            | 318 (26)              | 342 (28)                    | .265    |
| Device/method of the first attempt–n.(%)                                                                                             |                       |                             | <.001   |
| Stent retriever                                                                                                                      | 834 (68)              | 864 (70)                    |         |
| Aspiration                                                                                                                           | 363 (30)              | 303 (25)                    |         |
| IAT                                                                                                                                  | 6 (0.5)               | 16 (1.3)                    |         |
| Abbreviations: EVT=endovascular thrombectomy; EXPno=Experience number; ICA=internal carotid artery, IAT=intra-arterial thrombolysis. |                       |                             |         |

1

2

Table II. Effect estimates for the association between interventionist's years of experience (EXPyyears) and clinical, radiological, and work-flow outcomes.

|                                         | EE      | Unadjusted<br>(95%CI)  | Adjusted<br>(95%CI)  |
|-----------------------------------------|---------|------------------------|----------------------|
| Clinical outcomes                       |         |                        |                      |
| NIHSS score at 24-48h                   | $\beta$ | 0.15 (0.03 to 0.26)    | 0.10 (-0.01 to 0.22) |
| mRS score at 90 d                       | cOR     | 0.975 (0.955 to 0.996) | 0.99 (0.96 to 1.01)  |
| Mortality at 90 d                       | OR      | 1.02 (0.99 to 1.04)    | 1.00 (0.97 to 1.04)  |
| Safety outcomes                         |         |                        |                      |
| Occurrence any SAEs†                    | OR      | 1.03 (1.01 to 1.05)    | 1.01 (0.98 to 1.05)  |
| Stroke progression‡                     | OR      | 1.03 (0.99 to 1.07)    | 1.03 (0.99 to 1.08)  |
| New ischemic stroke‡                    | OR      | 1.07 (0.99 to 1.16)    | 1.06 (0.97 to 1.16)  |
| Symptomatic ICH†                        | OR      | 1.01 (0.97 to 1.06)    | 1.00 (0.95 to 1.05)  |
| Imaging outcomes                        |         |                        |                      |
| Post-interventional eTICI score‡        | cOR     | 1.00 (0.98 to 1.02)    | 1.02 (0.98 to 1.06)  |
| Recanalization‡                         | OR      | 0.99 (0.97 to 1.02)    | 1.03 (0.99 to 1.08)  |
| Safety outcomes scored on DSA           |         |                        |                      |
| Occurrence of procedural complications† | OR      | 1.02 (0.99 to 1.05)    | 1.01 (0.97 to 1.06)  |
| Dissection‡                             | OR      | 1.04 (0.96 to 1.12)    | 1.03 (0.95 to 1.12)  |
| Perforation‡                            | OR      | 0.98 (0.90 to 1.07)    | 0.97 (0.88 to 1.07)  |
| Embolus new territory‡                  | OR      | 0.98 (0.92 to 1.03)    | 0.97 (0.91 to 1.02)  |
| Distal thrombus‡                        | OR      | 0.99 (0.96 to 1.02)    | 0.99 (0.95 to 1.03)  |
| Vasospasm‡                              | OR      | 0.94 (0.89 to 0.99)    | 0.94 (0.88 to 0.99)  |

|                                                                                                                                                                                                                                                                                                                                                                                                                                                                                                                                                                                                                                                                                                                                                                                                        |         |                       |                        |
|--------------------------------------------------------------------------------------------------------------------------------------------------------------------------------------------------------------------------------------------------------------------------------------------------------------------------------------------------------------------------------------------------------------------------------------------------------------------------------------------------------------------------------------------------------------------------------------------------------------------------------------------------------------------------------------------------------------------------------------------------------------------------------------------------------|---------|-----------------------|------------------------|
| Workflow outcomes                                                                                                                                                                                                                                                                                                                                                                                                                                                                                                                                                                                                                                                                                                                                                                                      |         |                       |                        |
| Number of attempts‡                                                                                                                                                                                                                                                                                                                                                                                                                                                                                                                                                                                                                                                                                                                                                                                    | $\beta$ | 0.01 (-0.02 to 0.03)  | 0.01 (-0.02 to 0.03)   |
| Duration procedure(min)§                                                                                                                                                                                                                                                                                                                                                                                                                                                                                                                                                                                                                                                                                                                                                                               | $\beta$ | -0.09 (-0.51 to 0.33) | -0.79 (-1.45 to -0.13) |
| <p>‡Additionally adjusted for: clot burden score; ICA stenosis/dissection/occlusion.</p> <p>§Additionally adjusted for: clot burden score; ICA stenosis/dissection/occlusion; ICA stent placement; general anaesthesia.</p> <p>Abbreviations: EE=effect estimate; NIHSS=National Institutes of Health Stroke Scale; ASPECTS=Alberta Stroke Programme Early CT score; mRS=modified Rankin Scale; eTICI=extended thrombolysis in cerebral infarction scale; IVT=intravenous thrombolysis; h=hour; SAE=serious adverse event; ICH=intracranial haemorrhage; DSA=digital subtraction angiography; ICA=internal carotid artery; DOAC=direct oral anticoagulant.</p> <p>†Additionally adjusted for: clot burden score; ICA stenosis/dissection/occlusion; antiplatelet, DOAC, coumarin, and heparin use.</p> |         |                       |                        |

1
