# Supplementary material for: Influence of the interventionist’s experience on outcomes of endovascular thrombectomy in acute ischemic stroke: results from the MR CLEAN Registry
Source: PubMed Central journal article supplement — J Neurointerv Surg. 2022 Jan 20;15(2):113–9. doi: 10.1136/neurintsurg-2021-018295 (PMC9872238; doi:10.1136/neurintsurg-2021-018295), 2022-01-20
Supplement: neurintsurg-2021-018295supp002.pdf [file neurintsurg-2021-018295supp002.pdf]

1 **SUPPLEMENTAL MATERIAL**

2

3 **Table of contents**

4 - List of group authors

5

6

1 **List of group authors**

2 MR CLEAN (Multicenter Randomized Controlled Trial of Endovascular Treatment for Acute  
3 Ischemic Stroke in the Netherlands) Registry Investigators – group authors

4

5 *Executive committee*

6 Diederik W.J. Dippel<sup>1</sup>; Aad van der Lugt<sup>2</sup>; Charles B.L.M. Majoie<sup>3</sup>; Yvo B.W.E.M.

7 Roos<sup>4</sup>; Robert J. van Oostenbrugge<sup>5</sup>; Wim H. van Zwam<sup>6</sup>; Jelis Boiten<sup>14</sup>; Jan Albert Vos<sup>8</sup>

8 *Study coordinators*

9 Ivo G.H. Jansen<sup>3</sup>; Maxim J.H.L. Mulder<sup>1,2</sup>; Robert- Jan B. Goldhoorn<sup>5,6</sup>; Kars C.J.

10 Compagne<sup>2</sup>; Manon Kappelhof<sup>3</sup>; Josje Brouwer<sup>4</sup>; Sanne J. den Hartog<sup>1,2,40</sup>; Wouter H.

11 Hinsenveld<sup>5,6</sup>

12 *Local principal investigators*

13 Diederik W.J. Dippel<sup>1</sup>; Bob Roozenbeek<sup>1</sup>; Aad van der Lugt<sup>2</sup>; Adriaan C.G.M. van Es<sup>2</sup>; Charles

14 B.L.M. Majoie<sup>3</sup>; Yvo B.W.E.M. Roos<sup>4</sup>; Bart J. Emmer<sup>3</sup>; Jonathan M. Coutinho<sup>4</sup>; Wouter J.

15 Schonewille<sup>7</sup>; Jan Albert Vos<sup>8</sup>; Marieke J.H. Wermer<sup>9</sup>; Marianne A.A. van Walderveen<sup>10</sup>; Julie

16 Staals<sup>5</sup>; Robert J. van Oostenbrugge<sup>5</sup>; Wim H. van Zwam<sup>6</sup>; Jeannette Hofmeijer<sup>11</sup>; Jasper M.

17 Martens<sup>12</sup>; Geert J. Lycklama à Nijeholt<sup>13</sup>; Jelis Boiten<sup>14</sup>; Sebastiaan F. de Bruijn<sup>15</sup>; Lukas C.

18 van Dijk<sup>16</sup>; H. Bart van der Worp<sup>17</sup>; Rob H. Lo<sup>18</sup>; Ewoud J. van Dijk<sup>19</sup>; Hieronymus D.

19 Boogaarts<sup>20</sup>; J. de Vries<sup>22</sup>; Paul L.M. de Kort<sup>21</sup>; Julia van Tuijl<sup>21</sup>; Jo P. Peluso<sup>26</sup>; Puck

20 Fransen<sup>22</sup>; Jan S.P. van den Berg<sup>22</sup>; Boudewijn A.A.M. van Hasselt<sup>23</sup>; Leo A.M. Aerden<sup>24</sup>; René

21 J. Dallinga<sup>25</sup>; Maarten Uyttenboogaart<sup>28</sup>; Omid Eschgi<sup>29</sup>; Reinoud P.H. Bokkers<sup>29</sup>; Tobien

22 H.C.M.L. Schreuder<sup>30</sup>; Roel J.J. Heijboer<sup>30</sup>; Koos Keizer<sup>32</sup>; Lonneke S.F. Yo<sup>33</sup>; Heleen M. den

23 Hertog<sup>22</sup>; Tomas Bulut<sup>35</sup>; Paul J.A.M. Brouwers<sup>34</sup>

24 *Imaging assessment committee*

- 1 Charles B.L.M. Majoie<sup>3</sup>(chair);Wim H. van Zwam<sup>6</sup>;Aad van der Lugt<sup>2</sup>;Geert J. Lycklama à  
2 Nijeholt<sup>13</sup>;Marianne A.A. van Walderveen<sup>10</sup>;Marieke E.S. Sprengers<sup>3</sup>;Sjoerd F.M.  
3 Jenniskens<sup>27</sup>;René van den Berg<sup>3</sup>;Albert J. Yoo<sup>38</sup>;Ludo F.M. Beenen<sup>3</sup>;Alida A.  
4 Postma<sup>6</sup>;Stefan D. Roosendaal<sup>3</sup>;Bas F.W. van der Kallen<sup>13</sup>;Ido R. van den  
5 Wijngaard<sup>13</sup>;Adriaan C.G.M. van Es<sup>2</sup>;Bart J. Emmer<sup>3</sup>;Jasper M. Martens<sup>12</sup>; Lonneke S.F.  
6 Yo<sup>33</sup>;Jan Albert Vos<sup>8</sup>; Joost Bot<sup>36</sup>, Pieter-Jan van Doormaal<sup>2</sup>; Anton Meijer<sup>27</sup>;Elyas Ghariq<sup>13</sup>;  
7 Reinoud P.H. Bokkers<sup>29</sup>;Marc P. van Proosdij<sup>37</sup>;G. Menno Krietemeijer<sup>33</sup>;Jo P.  
8 Peluso<sup>26</sup>;Hieronymus D. Boogaarts<sup>20</sup>;Rob Lo<sup>18</sup>;;Wouter Dinkelaar<sup>2</sup>;Auke P.A.  
9 Appelman<sup>29</sup>;Bas Hammer<sup>16</sup>;Sjoert Pegge<sup>27</sup>;Anouk van der Hoorn<sup>29</sup>;Saman Vinke<sup>20</sup>.
- 10 *Writing committee*
- 11 Diederik W.J. Dippel<sup>1</sup>(chair);Aad van der Lugt<sup>2</sup>;Charles B.L.M. Majoie<sup>3</sup>;Yvo B.W.E.M.  
12 Roos<sup>4</sup>;Robert J. van Oostenbrugge<sup>5</sup>;Wim H. van Zwam<sup>6</sup>;Geert J. Lycklama à Nijeholt<sup>13</sup>;Jelis  
13 Boiten<sup>14</sup>;Jan Albert Vos<sup>8</sup>;Wouter J. Schonewille<sup>7</sup>;Jeannette Hofmeijer<sup>11</sup>;Jasper M.  
14 Martens<sup>12</sup>;H. Bart van der Worp<sup>17</sup>;Rob H. Lo<sup>18</sup>
- 15 *Adverse event committee*
- 16 Robert J. van Oostenbrugge<sup>5</sup>(chair);Jeannette Hofmeijer<sup>11</sup>;H. Zwenneke Flach<sup>23</sup>
- 17 *Trial methodologist*
- 18 Hester F. Lingsma<sup>40</sup>
- 19 *Research nurses / local trial coordinators*
- 20 Naziha el Ghannouti<sup>1</sup>;Martin Sterrenberg<sup>1</sup>;Wilma Pellikaan<sup>7</sup>;Rita Sprengers<sup>4</sup>;Marjan  
21 Elfrink<sup>11</sup>;Michelle Simons<sup>11</sup>;Marjolein Vossers<sup>12</sup>;Joke de Meris<sup>14</sup>;Tamara Vermeulen<sup>14</sup>;Annet  
22 Geerlings<sup>19</sup>;Gina van Vemde<sup>22</sup>;Tiny Simons<sup>30</sup>;Gert Messchendorp<sup>28</sup>;Nynke Nicolaij<sup>28</sup>;Hester  
23 Bongenaar<sup>32</sup>;Karin Bodde<sup>24</sup>;Sandra Kleijn<sup>34</sup>;Jasmijn Lodico<sup>34</sup>; Hanneke Droste<sup>34</sup>;Maureen  
24 Wollaert<sup>5</sup>;Sabrina Verheesen<sup>5</sup>;D. Jeurissen<sup>5</sup>;Erna Bos<sup>9</sup>;Yvonne Drabbe<sup>15</sup>;Michelle

1 Sandiman<sup>15</sup>;Nicoline Aldering<sup>11</sup>;Berber Zweedijk<sup>17</sup>;Jocova Vervoort<sup>21</sup>;Eva Ponjee<sup>22</sup>;Sharon  
2 Romviel<sup>19</sup>;Karin Kanselaar<sup>19</sup>;Denn Barning<sup>10</sup>

3 *PhD / Medical students*

4 Esmee Venema<sup>40</sup>; Vicky Chalos<sup>1,40</sup>; Ralph R. Geuskens<sup>3</sup>; Tim van Straaten<sup>19</sup>;Saliha Ergezen<sup>1</sup>;  
5 Roger R.M. Harmsma<sup>1</sup>; Daan Muijres<sup>1</sup>; Anouk de Jong<sup>1</sup>;Olvert A. Berkhemer<sup>1,3,6</sup>;Anna M.M.  
6 Boers<sup>3,39</sup>; J. Huguet<sup>3</sup>;P.F.C. Groot<sup>3</sup>;Marieke A. Mens<sup>3</sup>;Katinka R. van Kranendonk<sup>3</sup>;Kilian M.  
7 Treurniet<sup>3</sup>;Manon L. Tolhuisen<sup>3,39</sup>;Heitor Alves<sup>3</sup>;Annick J. Weterings<sup>3</sup>;Eleonora L.F.  
8 Kirkels<sup>3</sup>;Eva J.H.F. Voogd<sup>11</sup>;Lieve M. Schupp<sup>3</sup>;Sabine L. Collette<sup>28,29</sup>;Adrien E.D.  
9 Groot<sup>4</sup>;Natalie E. LeCouffe<sup>4</sup>;Praneeta R. Konduri<sup>39</sup>;Haryadi Prasetya<sup>39</sup>;Nerea Arrarte-  
10 Terreros<sup>39</sup>;Lucas A. Ramos<sup>39</sup>

11 *List of affiliations*

12 Department of Neurology<sup>1</sup>, Radiology<sup>2</sup>, Public Health<sup>40</sup>, Erasmus MC University Medical  
13 Centre; Department of Radiology and Nuclear Medicine<sup>3</sup>, Neurology<sup>4</sup>, Biomedical  
14 Engineering & Physics<sup>39</sup>, Amsterdam UMC, University of Amsterdam, Amsterdam;

15 Department of Neurology<sup>5</sup>, Radiology<sup>6</sup>, Maastricht University Medical Centre and  
16 Cardiovascular Research Institute Maastricht (CARIM);Department of Neurology<sup>7</sup>,  
17 Radiology<sup>8</sup>, Sint Antonius Hospital, Nieuwegein; Department of Neurology<sup>9</sup>, Radiology<sup>10</sup>,  
18 Leiden University Medical Centre; Department of Neurology<sup>11</sup>, Radiology<sup>12</sup>, Rijnstate  
19 Hospital, Arnhem; Department of Radiology<sup>13</sup>, Neurology<sup>14</sup>, Haaglanden MC, the Hague;  
20 Department of Neurology<sup>15</sup>, Radiology<sup>16</sup>, Haga Hospital, the Hague;Department of  
21 Neurology<sup>17</sup>, Radiology<sup>18</sup>, University Medical Centre Utrecht; Department of Neurology<sup>19</sup>,  
22 Neurosurgery<sup>20</sup>, Radiology<sup>27</sup>, Radboud University Medical Centre, Nijmegen; Department of  
23 Neurology<sup>21</sup>, Radiology<sup>26</sup>, Elisabeth-TweeSteden ziekenhuis, Tilburg;Department of  
24 Neurology<sup>22</sup>, Radiology<sup>23</sup>, Isala Klinieken, Zwolle; Department of Neurology<sup>24</sup>, Radiology<sup>25</sup>,

1 Reinier de Graaf Gasthuis, Delft; Department of Neurology<sup>28</sup>, Radiology<sup>29</sup>, University  
2 Medical Centre Groningen; Department of Neurology<sup>30</sup>, Radiology<sup>31</sup>, Atrium Medical Centre,  
3 Heerlen; Department of Neurology<sup>32</sup>, Radiology<sup>33</sup>, Catharina Hospital, Eindhoven;  
4 Department of Neurology<sup>34</sup>, Radiology<sup>35</sup>, Medisch Spectrum Twente, Enschede; Department  
5 of Radiology<sup>36</sup>, Amsterdam UMC, Vrije Universiteit van Amsterdam, Amsterdam;  
6 Department of Radiology<sup>37</sup>, Noordwest Ziekenhuisgroep, Alkmaar; Department of  
7 Radiology<sup>38</sup>, Texas Stroke Institute, Texas, United States of America.

8

9
